# Supplementary material for: Effects of establishing cultivated grassland on soil organic carbon fractions in a degraded alpine meadow on the Tibetan Plateau
Source: PeerJ. 2022 Sep 13;10:e14012. doi: 10.7717/peerj.14012 (PMC9480066; doi:10.7717/peerj.14012)
Supplement: Supplemental Information 2 [file peerj-10-14012-s002.xlsx]

## Sheet: Soil
No.	LOC I content	LOC II content	ROC content	TOC content	RIC	TN content	C:N ratio	BD	pH	MBC	Clay	Silt	Sand
	g kg-1	g kg-1	g kg-1	g kg-1	%			g cm-3		mg kg-1	%	%	%
DM-1	14.6	1.78	16.1	32.48	49.569	2.2342	14.5376	1.3255	8.18	536.595	5.26	58.65	36.09
DM-2	11.2	1.42	12.4	25.02	49.5604	1.78615	14.0078	1.3283	8.22	973.896	6.5	59.5	34
DM-3	11.2	1.19	14.7	27.09	54.2636	1.71911	15.7582	1.3696	8.21	485.621	6.22	56.28	37.5
DM-4	17.5	2.09	17.6	37.19	47.3245	2.57289	14.4546	1.2635	8.07	591.223	6.2	56.88	36.92
DM-5	9.5	1.12	10.5	21.12	49.7159	1.4174	14.9005	1.3822	8.2	395.517	6.96	55.76	37.28
CG3-1	11.7	2.01	15.2	28.91	52.577	1.8439	15.6787	1.4304	7.48	647.795	5.86	57.39	36.75
CG3-2	12.6	1.99	13.2	27.79	47.4991	2.05739	13.5074	1.318	7.8	560.258	5.65	48.86	45.49
CG3-3	16.2	2.26	14.9	33.36	44.6643	2.42722	13.7441	1.3747	7.96	681.643	5.54	58.22	36.24
CG3-4	16.3	2.86	18.2	37.36	48.7152	2.65012	14.0975	1.4397	7.97	931.802	5.93	53.39	40.68
CG3-5	16.1	2.7	11.9	30.7	38.7622	2.57712	11.9125	1.2652	7.46	1151.69	5.23	53.8	40.97
CG12-1	15	2.68	11.8	29.48	40.0271	2.20162	13.3901	1.4524	8.14	1201.34	7.46	46.62	45.92
CG12-2	15.3	3.68	14.7	33.68	43.6461	2.69208	12.5108	1.3211	8.21	1254.24	6.61	41.46	51.93
CG12-3	16.9	3.11	18.3	38.31	47.7682	2.55436	14.9979	1.6399	8.21	1088.36	5.71	52.55	41.74
CG12-4	14.8	2.75	12.1	29.65	40.8094	2.2	13.4773	1.416	8.14	862.338	4.48	56.23	39.29
CG12-5	16.7	3.61	20.4	40.71	50.1105	2.94869	13.8061	1.4213	7.98	967.739	5.22	52.78	42
CG17-1	17.5	2.35	19.4	39.25	49.4268	2.76013	14.2203	1.3949	6.93	1163.85	6.18	52.83	40.99
CG17-2	13.7	1.85	16.3	31.85	51.1774	1.79124	17.781	1.3107	8.14	1569.12	5	57.77	37.23
CG17-3	18	2.33	21.4	41.73	51.2821	2.67138	15.6212	1.2462	7.74	1236.21	7.7	58.53	33.77
CG17-4	17.7	2.2	19	38.9	48.8432	2.70829	14.3633	1.5034	7.61	1167.98	8.22	47.1	44.68
CG17-5	15.3	2.33	21.8	39.43	55.2879	2.26164	17.4342	1.3629	8.09	1084.15	6.67	53.15	40.18

## Sheet: Plant
No.	Above-ground biomass	Root biomass	Above-ground C content	Above-ground N content	Above-ground C:N ratio	Root C content	Root N content	Root C:N ratio
	g m-2	g m-2	g kg-1	g kg-1		g kg-1	g kg-1
DM-1	83	2154.34	411.2	16.9	24.3314	387	16.1	24.0373
DM-2	51.68	2601.5	335.8	13.8	24.3333	266.9	14.8	18.0338
DM-3	52.04	2570.3	357.8	15	23.8533	350.9	11.89	29.5122
DM-4	41	2123.14	316.2	8.25	38.3273	305.4	12.8	23.8594
DM-5	30.16	1353.61	351.8	16.2	21.716	292.9	13.2	22.1894
CG3-1	195.6	1648.25	438.9	14.6	30.0616	263	7.8	33.7179
CG3-2	233.6	1078.04	457.5	14.2	32.2183	285.9	7.11	40.211
CG3-3	247.76	1136.1	478.4	10.2	46.902	304.4	8.06	37.7667
CG3-4	211.56	1590.19	487.6	16.7	29.1976	252.9	7.44	33.9919
CG3-5	272.64	1111.83	432.5	11.8	36.6525	323.1	8.21	39.3544
CG12-1	255.48	3237.58	456.7	8.91	51.257	221.7	7.21	30.749
CG12-2	264.68	4880.63	459.2	5.93	77.4368	202.4	6.48	31.2346
CG12-3	263.12	2247.06	462.4	7.36	62.8261	324.5	10.4	31.2019
CG12-4	261.92	4471.6	462	8.59	53.7835	239.1	5.99	39.9165
CG12-5	325.52	2457.65	465	7.03	66.1451	285.4	6.59	43.308
CG17-1	202.72	2663.03	478.1	8.93	53.5386	161.1	3.27	49.2661
CG17-2	248.32	1286.02	467.7	7.63	61.2975	230.6	7.22	31.9391
CG17-3	293.12	2758.35	458.1	7.78	58.8817	239.3	3.48	68.7644
CG17-4	133.96	1857.1	476.7	11.5	41.4522	159.9	2.95	54.2034
CG17-5	200.8	2404.78	447.2	6.36	70.3145	345.8	6.07	56.9687
